# Supplementary material for: A solid-state study of the inclusion of endosulfan in native and derivatised cyclodextrins using X-ray diffraction and thermoanalytical methods
Source: Royal Society of Chemistry journal article supplement (doi:10.1039/c2nj40364a), 2012-01-01
Supplement: c2nj40364a.pdf [file c2nj40364a.pdf]

## Supporting information

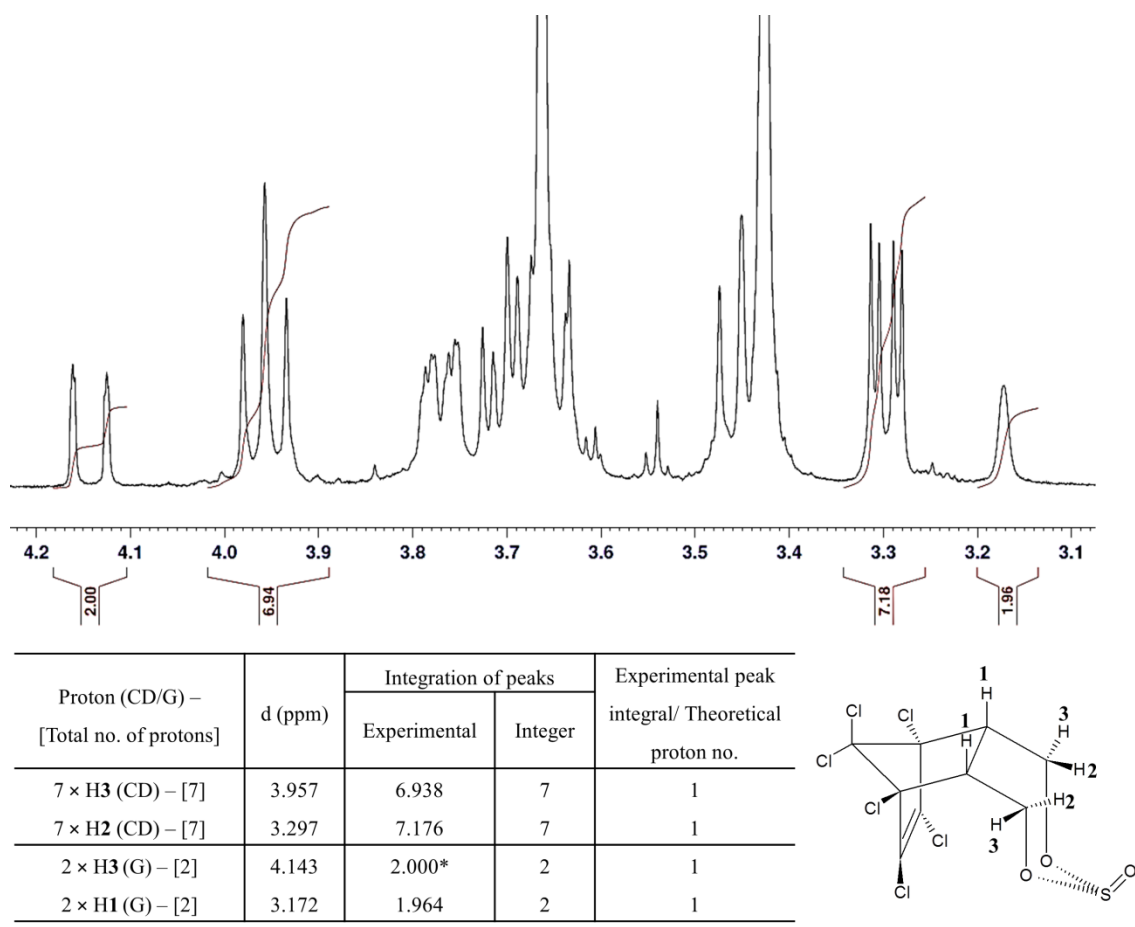

**Figure S1.** <sup>1</sup>H NMR spectra and tabulated results used to confirm the 1:1 host-guest ratio of the DIMEB·β-endosulfan complex.

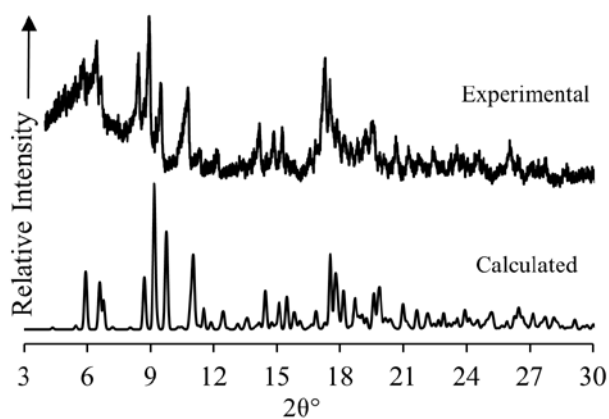

**Figure S2.** Calculated and experimental PXRD traces of the DIMEB·β-endosulfan complex.
